4. Lederman RP, Lederman E, Work BA Jr, McCann DS: The relationship of maternal anxiety, plasma catecholamines, and plasma cortisol to progress in labor. *Am J Obstet Gynecol* 132:495-500, 1978
5. Melzack R: The myth of painless childbirth (The John J. Bonica Lecture). *Pain* 19:321-337, 1984
6. Shnider SM, Wright RG, Levinson G, Roizen MF, Wallis KL, Rolbin SH, Craft JB: Uterine blood flow and plasma norepinephrine changes during maternal stress in the pregnant ewe. *ANESTHESIOLOGY* 50:524-527, 1979
7. Lederman RP, Lederman E, Work BA Jr, McCann DS: Anxiety

- and epinephrine in multiparous labor: Relationship to duration of labor and fetal heart rate pattern. *Am J Obstet Gynecol* 153:870-877, 1985
8. Hollmen AI, Jouppila R, Jouppila P, Koivula A, Vierola H: Effect of extradural analgesia using bupivacaine and 2-chloroprocaine on intervillous blood flow during normal labour. *Br J Anaesth* 54:837-842, 1982
9. Huch R, Huch A, Lubbes DW: *Transcutaneous PO<sub>2</sub>*. New York, Thieme-Stratton, 1981, p 139

(Accepted for publication April 2, 1987.)

Anesthesiology  
67:154, 1987

### More on Management of the Difficult Airway

*To the Editor:*—I read, with interest, the article by Bedger *et al.*<sup>1</sup> outlining the use of a jet-styler endotracheal catheter for the management of patients with a difficult airway. We have used a similar technique in our institution. In place of the "jet-styler," however, we use an 18-French Salem Sump tube with the proximal end of the tube cut off. This allows us to connect our jet ventilator directly to the suction port of the Salem Sump tube. This tube has multiple side holes at the distal end, allowing for ventilation at low gas flows per orifice.

Additionally, during changing endotracheal tubes in the Intensive Care Unit, the nasogastric tube can be passed through the endotracheal tube, the endotracheal tube can be removed, and the patient ventilated prior to or during the endotracheal change process. This technique has been described as a means of changing endotracheal tubes damaged during orthognathic procedures.<sup>2</sup>

Anesthesiology  
67:154-155, 1987

The nasogastric tube is inexpensive, readily available, and easy to use if a jet-styler is unavailable.

LEWIS A. COVELER, M.D.  
*Associate Professor and Chief  
Ben Taub General Hospital  
Department of Anesthesiology  
Baylor College of Medicine  
Texas Medical Center  
Houston, Texas 77030*

### REFERENCES

1. Bedger RC Jr, Chang J-L: A jet-styler endotracheal catheter for difficult airway management. *ANESTHESIOLOGY* 66:221-223, 1987
2. Coveler LA: Anesthesia for orthognathic surgery. *Current Advances in Oral and Maxillofacial Surgery*. Edited by Irby WB, Shelton DW. St. Louis, C. V. Mosby Company, 1986, pp 38-47

(Accepted for publication April 13, 1987.)

### Foreign Body from a Tube of Anesthetic Ointment

*To the Editor:*—The common practice of lubricating endotracheal tubes with water-soluble ointment may pose an additional risk to our patients. Prior to insertion of an endotracheal tube, pre-lubricated with Xylocaine 5% ointment (Astra Pharmaceutical Products Inc., manufactured by MK Laboratories, Inc., lot #511004, expiration date 11/88), light was noted to be reflected off a foreign body. Closer examination revealed that the small plastic cap liner had become delaminated from its backing and was stuck to the ointment. The plastic seal is clear, and not radioopaque, so its detection to and after insertion of the endotracheal tube would be very difficult. Figure 1 shows the defect as discovered. Examination of our supplies revealed the same defect to exist in many other tubes of the same ointment.

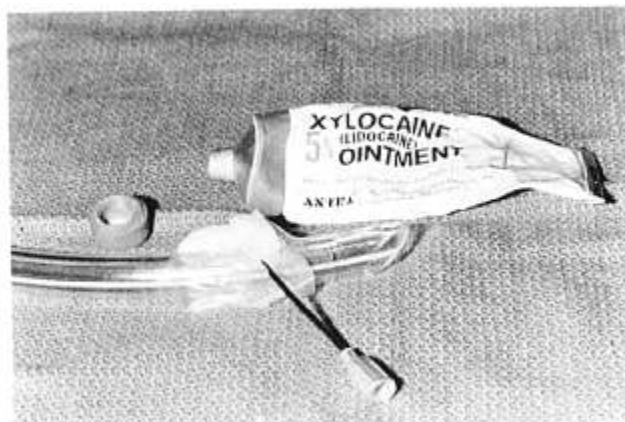

FIG. 1. Cap liner embedded in ointment on the cuff of the endotracheal tube.

STEVEN JACKSON, C.R.N.A.  
*Department of Anesthesiology  
University of Massachusetts Medical Center*

GARY W. WELCH, M.D., PH.D.  
*Chairman*

*Professor of Anesthesiology and Surgery  
Associate Director of the SICU*

*55 North Lake Avenue  
Worcester, Massachusetts 01605*

*(Accepted for publication April 13, 1987.)*

Anesthesiology  
67:155, 1987

*In Reply:*—Astra attempts to diligently monitor the safety and effectiveness of its products and, in this effort, carefully evaluates all spontaneous reports from health professionals throughout the United States. Reports such as Mr. Jackson's enable us to become aware of problems, and allow us to take expeditious corrective action.

Review of our files indicates that a total of 12 similar complaints from seven reporting sources have been received since 1983. There have been no reports of patient injury associated with any of these reports.

Astra receives tubes and lined tube caps preassembled from a supplier. The individual cap liners are produced by a punch-out process from a large sheet of mylar liner bound to a pulp backing. We believe that rare detachment of the mylar liner from the pulp backing may be the result of occasional small areas of incomplete bonding between these two materials.

Accordingly, we have contacted the supplier of tubes and tube caps used for Xylocaine® Ointment and Xylocain® Jelly, and are seeking implementation of additional measures to assure that the pulp-plastic laminating step in preparing the cap liner is performed such that the lamination is always uniform and complete.

Other measures being investigated include the introduction of a new closure system which would not require a mylar liner bound to pulp for effective tube closure.

In addition, we have applied to the Food and Drug Administration for use of an easily visualized black rubber liner in the tube caps of Xylocain® 2% Jelly. This would allow immediate detection, by the practitioner, of improper liner detachment from the cap, should it occur.

Astra continues to actively pursue this matter in order to assure correction of the problem. We thank Mr. Jackson and Dr. Welch for notifying us of their concerns, and encourage all practitioners who encounter similar situations to do the same.

WILLIAM E. GRAY, JR., M.D.  
*Director, Medical Information Services  
Astra Pharmaceutical Products, Inc.  
Otis Street  
Westborough, Massachusetts 01581*

*(Accepted for publication April 13, 1987.)*
